# Supplementary material for: Understanding and preference toward DOs and OMT before and after an osteopathic principles and practice fellow lecture series
Source: publisher site journal article supplement (doi:10.1515/jom-2022-0139), 2022-11-29
Supplement: Supplementary file 1 [file j_jom-2022-0139_suppl_001.pdf]

### *Pre- and Post- Survey*

*Note: Participants were asked how many lectures they had attended (question #10) in the post-survey only.*

1. How much do you agree with the following statement: I understand what the career of a DO entails.  
(1=strongly disagree, 3=neutral, 5=strongly agree)
  
2. How much do you agree with the following statement: I understand the origins and history of osteopathic medicine in the US.  
(1=strongly disagree, 3=neutral, 5=strongly agree)
  
3. How much do you agree with the following statement: I understand what Osteopathic Manipulative Medicine is.  
(1=strongly disagree, 3=neutral, 5=strongly agree)
  
4. How much do you agree with the following statement: I am likely to see a DO as my own personal physician.  
(1=strongly disagree, 3=neutral, 5=strongly agree)
  
5. How much do you agree with the following statement: I am likely to recommend that a loved one see a DO as their personal physician.  
(1=strongly disagree, 3=neutral, 5=strongly agree)
  
6. In your own words, describe the difference between allopathic and osteopathic medicine. (175 characters maximum)
  
7. In your own words, define somatic dysfunction. (175-characters maximum)
  
8. In your own words, describe the ways in which osteopathic manipulative medicine (OMM) can be applied to patient encounters. (175-characters maximum)
  
9. Which of the following professional schools are you planning on applying to following the completion of the MSBS program? (please mark ALL that apply)  
  
DO Schools  
MD Schools  
PA Schools  
MD and DO Schools  
None  
Other (please specify)
  
10. What program are you currently enrolled in? And, which lectures in this series did you attend? (please mark ALL that apply)  
  
MSBS ☒  
MSBS ☒  
Intro to Osteopathic Medicine  
What is Somatic Dysfunction and how is OMT used?  
OMT Demos
